# Supplementary material for: Investigation on structures, luminescent and magnetic properties of LnIII–M (M = FeIIHS, CoII) coordination polymers
Source: Royal Society of Chemistry journal article supplement (doi:10.1039/c0dt00516a), 2010-12-13
Supplement: c0dt00516a.pdf [file c0dt00516a.pdf]

# Investigation on Structures, Luminescent and Magnetic Properties of Ln<sup>III</sup>-M (M = Fe<sup>II</sup><sub>hs</sub>, Co<sup>II</sup>) Coordination Polymers

Xiao-Qing Zhao, Ping Cui, Bin Zhao,\* Wei Shi, and Peng Cheng\*

*Department of Chemistry, Nankai University, Tianjin 300071, People's Republic of China.*

## Explanation to the alert level A in CheckCIF

CIF files associated with the manuscript were checked by the program of ICUR, and the results exhibited that CIF files appeared some similar alerts level A.

The alerts level A about the shorter inter O...O distances is related to the disordered lattice water molecules, and the isolate O atoms are lattice water molecules. **17** possess large 1D channel, therefore, an alert level A is related to this.

To explain other alerts level A, taken **1** as an example, the shorter inter X...Y contact was found in the **1**- CheckCIF. Actually, after these A-alerts were checked carefully, we will find that so called shorter inter X...Y contact should be wrongly determined by program. In **1**, only half a molecule of ligand (L<sup>1</sup>) is crystallographically independent, as shown in following Figure S1 (left), and a complete L<sup>1</sup> molecule is displayed by proper symmetry operation, shown in Figure S1 (right). As a result, the distances among different atoms intra a molecule of L<sup>1</sup>, displaying in Figure 1(right), especially among six atoms from pyridine ring, were wrongly defined as A-alerts. The shorter inter H...H contact (such as **16**) is also related to a complete coordinated water molecule by symmetry operation.

---

\* To whom correspondence should be addressed. E-mail: zhaobin@nankai.edu.cn; pcheng@nankai.edu.cn. Fax: +86-22-23502458.

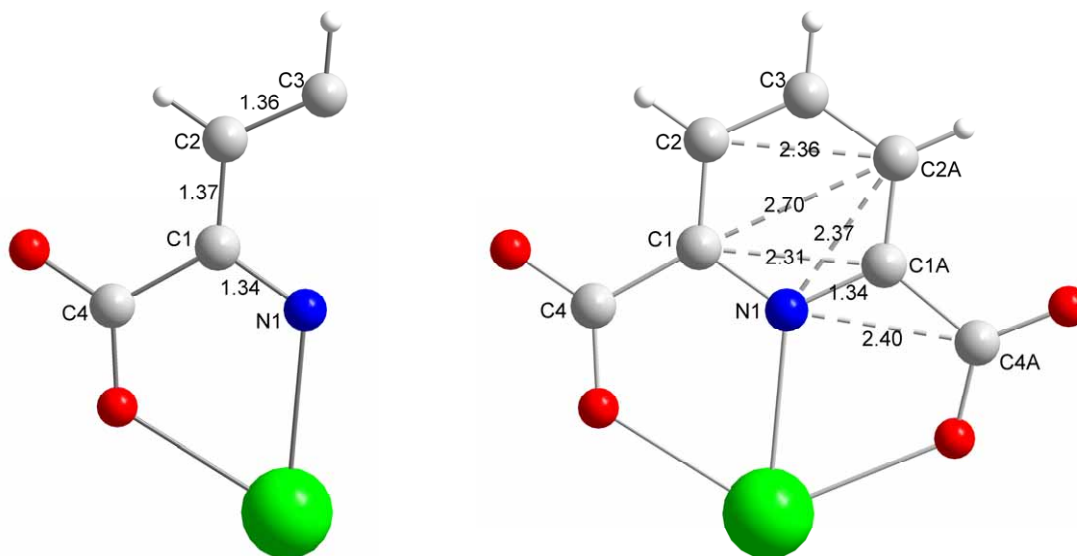

**Figure S1.** Half a  $L^1$  molecule (left) and a complete  $L^1$  molecule by symmetry operation ( $-y+1$ ,  $-x+1$ ,  $-z+1/2$ ) (right).

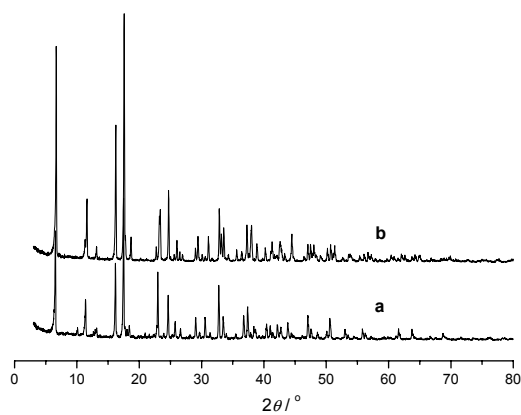

**Figure S2.** PXRD patterns of compounds **2** (a) and **7** (b).

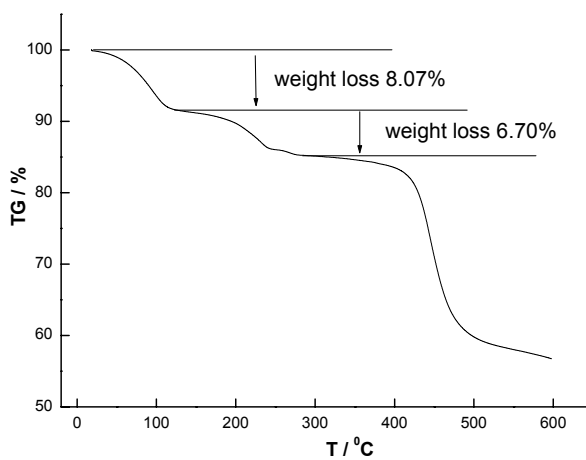

**Figure S3.** TGA curve for **7**.

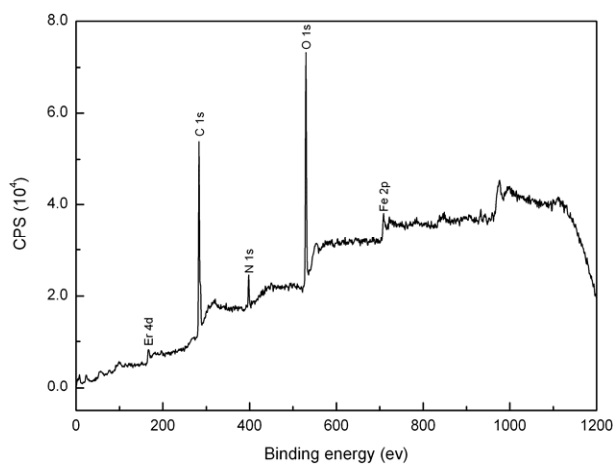

**Figure S4.** XPS for **9** at room temperature.

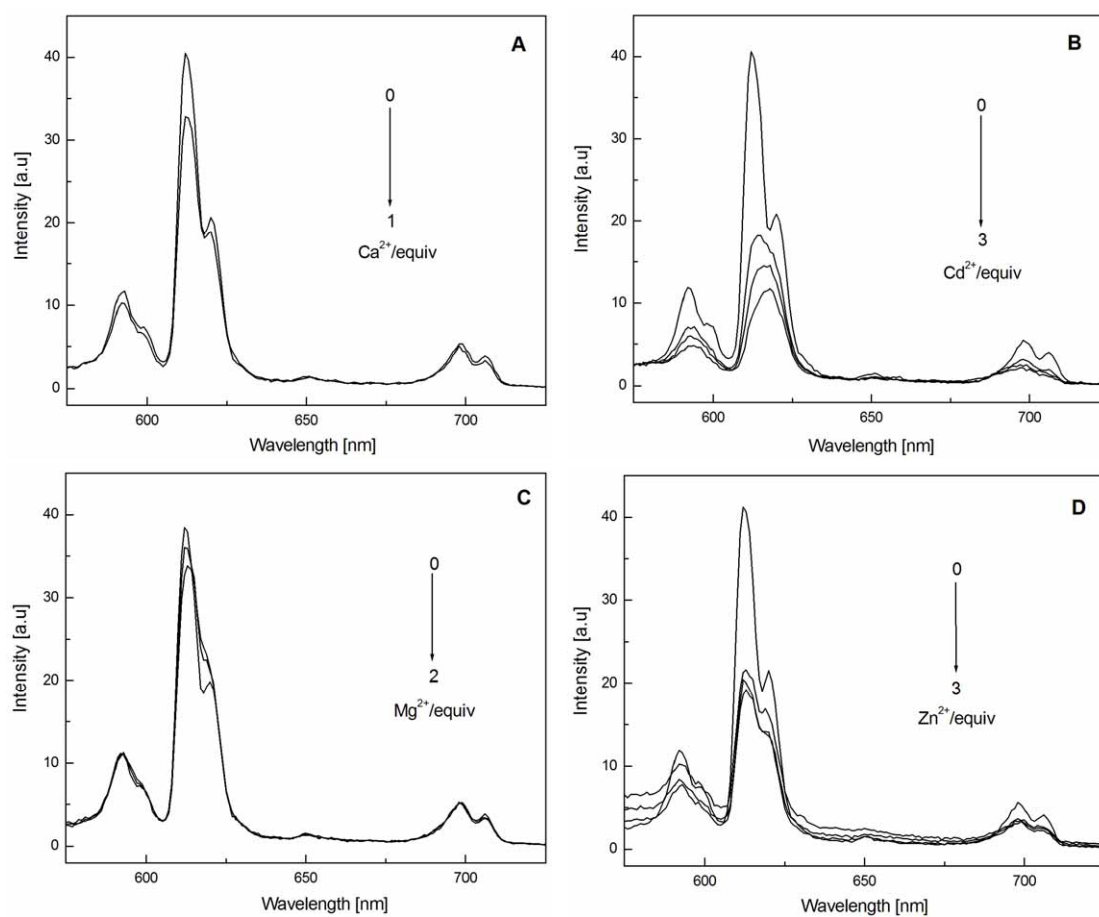

**Figure S5.** Emission spectra of **13** in DMF ( $10^{-4}$  M) at room temperature (excited at 280nm) in the presence of  $\sim$ 0-1 equivalents  $\text{Ca}^{2+}$  (**A**), 0-2 equivalents  $\text{Mg}^{2+}$  (**C**), 0-3 equivalents  $\text{Cd}^{2+}$  (**B**),  $\text{Zn}^{2+}$  (**D**) with respect to **13**.

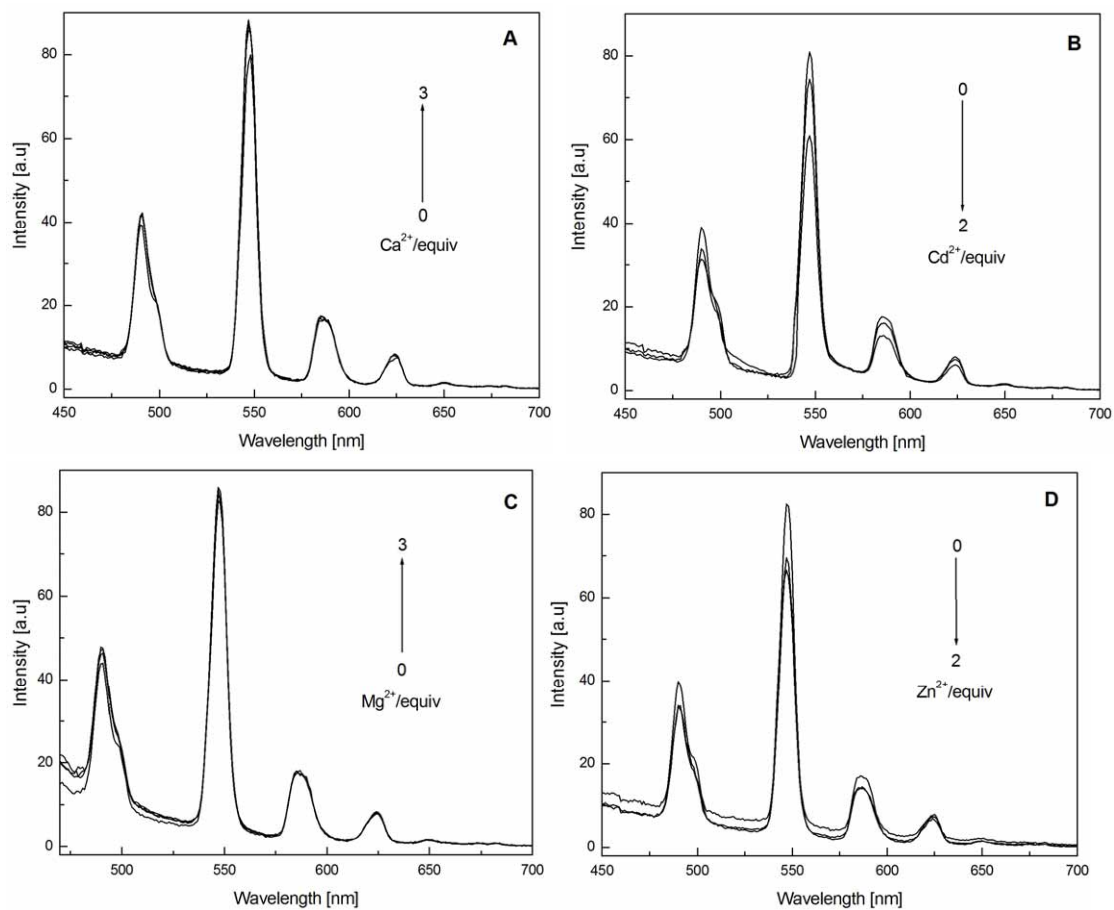

**Figure S6.** Emission spectra of **15** in DMF ( $10^{-4}$  M) at room temperature (excited at 280 nm) in the presence of  $\sim$ 0-3 equivalents  $\text{Ca}^{2+}$  (**A**),  $\text{Mg}^{2+}$  (**C**) and 0-2 equivalents  $\text{Cd}^{2+}$  (**B**),  $\text{Zn}^{2+}$  (**D**) with respect to **15**.

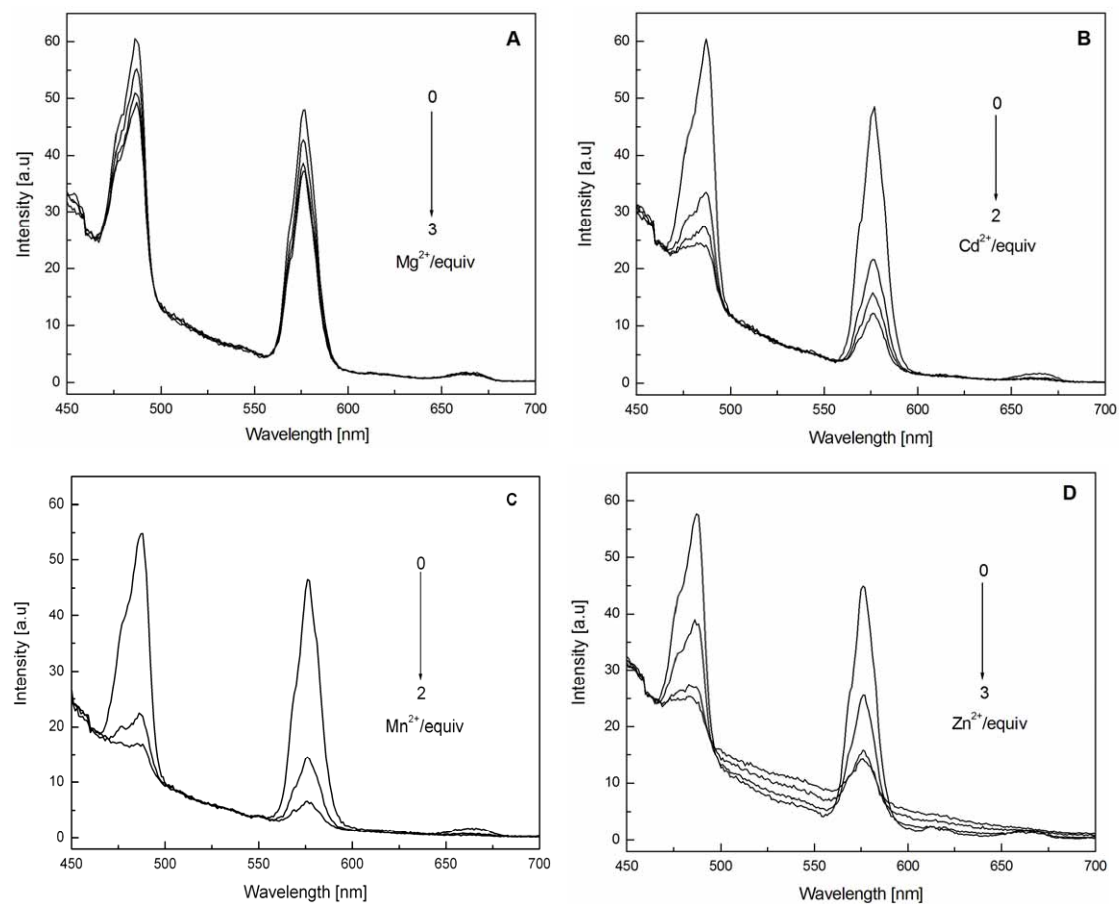

**Figure S7.** Emission spectra of **16** in DMF ( $10^{-4}$  M) at room temperature (excited at 280 nm) in the presence of  $\sim 0$ -3 equivalents  $\text{Mg}^{2+}$  (**A**),  $\text{Zn}^{2+}$  (**D**) and 0-2 equivalents  $\text{Cd}^{2+}$  (**B**),  $\text{Mn}^{2+}$  (**C**) with respect to **16**.
